# Supplementary material for: GMP-Compliant Radiosynthesis of [18F]GP1, a Novel PET Tracer for the Detection of Thrombi
Source: Pharmaceuticals (Basel). 2021 Jul 28;14(8):739. doi: 10.3390/ph14080739 (PMC8399972; doi:10.3390/ph14080739)
Supplement: Supplementary file 1 [file pharmaceuticals-14-00739-s001.zip]

Archive with 6 entries (6 files):
- Video S2_Rotierender_Patient 2.avi
- Video S4_Rotierende Klappe 2.avi
- Vidoe S3_Endokarditisklappe.avi
- Figure S1_Western blot.tif
- Supporting Information.pdf
- Video S1_Rotierende_Patient 1.avi
